# Supplementary material for: Non-Destructive Assessment of Aroma Volatiles from a Climacteric Near-Isogenic Line of Melon Obtained by Headspace Stir-Bar Sorptive Extraction
Source: Foods. 2013 Aug 28;2(3):401–14. doi: 10.3390/foods2030401 (PMC5302289; doi:10.3390/foods2030401)
Supplement: Supplementary File 1 [file foods-02-00401-s001.xlsx]

## Sheet: Suppl. Table 1
Supplementary Information
Table S1. Odor class descriptor of the aroma volatiles of the profile obtained by headspace stir-bar sorptive extraction (1 h) during ripening at 21 ± 1 °C and 93% ± 3% relative humidity of intact fruit of near-isogenic line SC3-5-1 (mean ± SE, n = 4).
Profile id.	Compound class or IUPAC name	CAS number	Odor class and description	Odor reference	Common name of the compounds
	Acetate esters				Acetate esters
1	ethyl acetate	000141-78-6	Pineapple, ethereal // ethereal fruity sweet weedy green // etherial, fruity, sweet, grape and rum-like.	[1–3]	Ethyl acetate
2	propyl acetate	000109-60-4	Sweet, ketonic, fermented, fruity, caramellic note ; solvent-like pungency, lifting, fusel, amyl alcohol, sweet and fruity // solvent celery fruity fusel raspberry pear.	[1,2]	n-Propyl acetate
3	butan-2-yl acetate	000105-46-4	Solven, fruity, banana.	[2,4]	Acetic acid, 1-methylpropyl ester
4	butyl acetate	000123-86-4	Bitter, green, sweaty, strong, sweet, fruity, banana, pear, pineapple note; ethereal, solvent, fruity, banana.	[1,2,4]	Acetic acid, butyl ester
5	3-methylbutyl acetate	000123-92-2	Banana ; sweet, banana, fruity with a ripe estry nuance // sweet fruity banana solvent	[1,2,4]	1-Butanol, 3-methyl-, acetate
6	2-methylbutyl acetate	000624-41-9	Herbaceous, ethereal rum-like, fermented-fruity odor, banana ; sweet, banana, fruity, ripe, estry and tropical with a juicy, fruit-like note // over ripe fruit sweet banana juicy fruit.	[1,2]	1-Butanol, 2-methyl-, acetate
7	2-methylpropyl acetate	000110-19-0	Fruity, flowery, strong, banana-pear note ; sweet, fruity, etherial with an apple banana nuance. sweet fruity ethereal banana tropical.	[1,2,4]	Acetic acid, 2-methylpropyl ester ; isobutyl acetate
8	pentyl acetate	000628-63-7	Herbaceous; ethereal, fruity, banana, pear, apple.	[1,2]	Acetic acid, pentyl ester; amyl acetate
9	hexyl acetate	000142-92-7	Fruity, spicy, herbal, sweet, wine, rubbery, tobacco, acidulous, citrus, green, herbs; green, fruity, sweet, fatty, fresh, apple and pear // fruity green apple banana sweet.	[1,2]	Acetic acid, hexyl ester
10	pent-4-enyl acetate	001576-85-8	Fruity, floral; green, plastic, weedy, acrylate, vegetable, metallic, cooked // green plastic weedy acrylate vegetable metallic cooked meat sulfide.	[1-3]	4-Penten-1-yl acetate
11	3-methylbut-2-enyl acetate	001191-16-8	Fruity; sweet, fresh, banana, fruity, jasmin, ripe, heliotrope, balsam.	[1,2]	2-Buten-1-ol, 3-methyl-, acetate; prenyl acetate
12	1-acetyloxypropan-2-yl acetate	000623-84-7	Fruity, acetic.	[2]	1,2-Propanediol, diacetate
13	3-acetyloxybutan-2-yl acetate	001114-92-7	Earthy.	[5]	2,3-Butanedioldiacetate
14	heptyl acetate	000112-06-1	Pleasant odor suggestive of pear (rose); fruity, spicy, herbal, sweet, wine, rubbery, tobacco, acidulous, citrus, green, herbs; green, waxy, fatty, citrus, aldehydic, winey and woody.	[1,3]	Acetic acid, heptyl ester
15	benzyl acetate	000140-11-4	Grassy, boiled, leaf-like, ice sweet waxy, fresh green melon with fruity pear notes; floral, burnt, boiled zucchini; fresh, boiled vegetable.	[2,3]	Acetic acid, phenylmethyl ester
16	octyl acetate	000112-14-1	Orange blossom or jasmine // green, earthy, mushroom, herbal, waxy.	[2,4]	Acetic acid, octyl ester
17	2-phenylethyl acetate	000103-45-7	Fruity; rose, floral, fruity, sweet.	[2,3]	Acetic acid, 2-phenylethyl ester
18	[(1R,4S,6R)-1,7,7-trimethyl-6-bicyclo[2.2.1]heptanyl] acetate	000125-12-2	Balsamic. Herbaceous, pine // balsam, camphor, herbal, woody, sweet.	[2,4]	Isobornyl acetate
	Non-acetate esters				Non-acetate esters
19	ethyl butanoate	000105-54-4	Fruite-apple; sweet, fruity, tutti frutti, lifting and diffusive.	[2,3]	Butanoic acid, ethyl ester
20	propyl propanoate	000106-36-5	Apple, banana, and pineapple; sharp chemical, pungent, sweet, fruity, pineapple.	[2,3]	Propanoic acid, propyl ester
21	2-methylpropyl propanoate	000540-42-1	Fruity; fruity, green, ether, sweet, tutti frutti, banana.	[2,3]	Propanoic acid, 2-methylpropyl ester
22	propyl butanoate	000105-66-8	Fruity, sweet, apricot, pineapple, rancid, sweaty.	[2]	Butanoic acid, propyl ester
23	butyl propanoate	000590-01-2	Fruity; sweet, estry, banana, ripe, tufti-frutti, bright, lifting, cherry and rum-like.	[2,3]	Propanoic acid, butyl ester
24	propyl 2-methylbutanoate	037064-20-3	Fruity; sweet, fruity; winey.	[1-3]	Butanoic acid, 2-methyl-, propyl ester
25	2-methylpropyl butanoate	000539-90-2	Pineapple, banana ; fruity, ethereal, banana, pear, pineapple.	[2,3]	Butanoic acid, 2-methylpropyl ester
26	3-methylbutyl propanoate	000105-68-0	Sweet, fruity, apricot-banana- pineapple-plum note; sweet, fruity, banana, pineapple, ripe, tropical fruit.	[1,2]	1-Butanol, 3-methyl-, propanoate
27	1-Butanol, 2-methyl-, propanoate	002438-20-2	Sweet fruity ethereal rum // sweet, banana, fruity, tutti-fruiti, apple, melon, tropical.	[2,6]	2-methylbutyl propanoate
28	2-methylpropyl 2-methylbutanoate	002445-67-2	Fruity; sweet fruity odor; sweet, fruity.	[2,3]	Butanoic acid, 2-methyl-, 2-methylpropyl ester
29	2-methylbutyl 2-methylpropanoate	002445-69-4	Fruit, cocoa aroma; mixed fruit odor; fruity, ethereal.	[2,3]	Propanoic acid, 2-methyl-, 2-methylbutyl ester
30	butyl 2-methylbutanoate	015706-73-7	Fruity; fresh, sweet, fruity; green, fruity, cocoa.	[1-3]	Butyl 2-methylbutanoate
31	3-methylbutyl 2-methylpropanoate	002050-01-3	Mixed fruit odor; fruity, waxy, apricot, pineapple, green, banana.	[2]	Propanoic acid, 2-methyl-, 3-methylbutyl ester
32	3-methylbutyl butanoate	000106-27-4	Fruite-apple; sweet, apricot, banana-like; fruity, green, apricot, pear, banana	[2,3]	Butanoic acid, 3-methylbutyl ester
33	2-methylpropyl hexanoate	000105-79-3	Winey-fruity; sweet, fruity, pineapple, green, peach, tropical.	[2,3]	Hexanoic acid, 2-methylpropyl ester
34	3-methylbutyl hexanoate	002198-61-0	Fruity; fruity, banana, apple, pineapple, green.	[2,3]	Isopentyl hexanoate
	Sulfur-derived compounds				Sulfur-derived compounds
35	1-methylsulfanylethanone	001534-08-3	Roasted meat; sulfurous, eggy, cheese, dairy, vegetable, cabbage.	[2,3]	Methyl thiolacetate
36	2-methyl-2-(methylsulfanyl)butane	013286-92-5	Not identified	-	Butane, 2-methyl-2-(methylthio)-
37	1-methylsulfanylbutan-1-one	002432-51-1	Cheese, fruity; rancid butter; sulfury, cheese, putrid, cabbage, garlic	[1-3]	Butanethioic acid, S-methyl ester
38	3-methyl-1-methylsulfanyl-butan-1-one	023747-45-7	Cheesy; sharp ripe cheesy, sulfurous, acrid fermented with tomato, mushroom and potato vegetative notes and dairy cheesy nuances.	[2,3]	S-Methyl 3-methylbutanethioate
39	3-methylsulfanylprop-1-ene	010152-76-8	Garlic, onion; alliaceous, garlic, onion.	[2,3]	Sulfide, allyl methyl
	Organic acids				Organic acids
40	acetic acid	000064-19-7	Sour; sour, vinegar, pungent; sharp, pungent, sour, vinegar.	[1–3]	Acetic acid
41	propanoic acid	000079-09-4	Sour milk; pungent, acidic, cheesy, vinegar.	[2,3]	Propanoic acid
42	hexanoic acid	000142-62-1	Apple, bakery, cheese; sour, fatty, sweat, cheese.	[2,3]	Hexanoic acid
43	heptanoic acid	000111-14-8	Cheesy; rancid, sour, cheesy, sweat.	[2,3]	Heptanoic acid
44	octanoic Acid	000124-07-2	Sweet, fatty; fatty, waxy, rancid oily, vegetable, cheesy.	[2,3]	Octanoic Acid
45	nonanoic acid	000112-05-0	Waxy; waxy, dirty, cheese, cultured, dairy.	[2,3]	Nonanoic acid
46	hexadecanoic acid	000057-10-3	Waxy, creamy fatty, soapy with a crisco like fatty, lard and tallow like mouth feel and a dairy nuance.	[2,3]	n-Hexadecanoic acid
	Aldehydes				Aldehydes
47	acetaldehyde	000075-07-0	Apple; pungent, etheral, fresh, fruity; pungent, etherial, fresh, lifting, penetrating, fruity and musty.	[1,2]	Acetaldehyde
48	furan-2-carbaldehyde	000098-01-1	Almond; woody, almond, sweet, fruity, flowery; sweet, brown, woody, bready, caramellic, with a slight phenolic nuance.	[1,2]	Furfural
49	heptanal	000111-71-7	Fruity; citrus fruit, green, fatty, dry fish, pesticide, solvent, smoky, rancid, fruity; fresh, aldehydic, fatty, green, herbal, wine-lee, ozone.	[1,2]	Heptanal
50	benzaldehyde	000100-52-7	Almond; burnt sugar, almond, woody; almond, fruity, powdery, nutty and benzaldehyde-like.	[1,2]	Benzaldehyde
51	decanal	000112-31-2	Orange peel; stewed, burnt, green, waxy, orange skin-like, floral, lemon, fatty, herbaceous, soapy; sweet, aldehydic, orange, waxy and citrus rind.	[1,2]	Decanal
	Ketones				Ketones
52	acetone	000067-64-1	Nail polish remover; glue, gruity; solvent, ethereal, apple, pear.	[1,2]	Acetone
53	4-hydroxy-4-methylpentan-2-one	000123-42-2	Faint, minty odor.	[4]	2-Pentanone, 4-hydroxy-4-methyl-; diacetone alcohol
54	6-methylhept-5-en-2-one	000110-93-0	Fruity; gruity, apple, musty, ketonic and creamy with slight cheesy and banana nuances.	[2]	5-Hepten-2-one, 6-methyl-
55	1-phenylethanone	000098-86-2	Flower; cheesy, sweet, almond-like, floral; sweet, cherry pit, marzipan and coumarinic, slight almond nutty and heliotropin-like vanilla nuance.	[1,2]	Acetophenone
	Terpenes				Terpenes
56	4,7,7-trimethylbicyclo[3.1.1]hept-3-ene	000080-56-8	Turpentine; terpeny, fruity, sweet, green, woody, pine, citrus, lime, camphoraceous; fresh camphor sweet pine earthy woody.	[1,2]	.alpha.-Pinene
57	1-methyl-4-prop-1-en-2-yl-cyclohexene	005989-27-5	Citrus; citrus-like, orange, fruity, peely; sweet, citrus and peely.	[2]	D-Limonene
58	1,8,8-trimethyl-7-oxabicyclo[2-2-2]octane	000470-82-6	Camphor; camphoraceous, minty, sweet, liquorices, menthol, pine; eucalyptus, herbal, camphor.	[1,2]	Eucalyptol
59	α-(1R,2S,6S,7S,8S)-8-isopropyl-1,3-dimethyltricyclo[4.4.0.0]dec-3-ene	003856-25-5	Woody, earthy; woody, spicy, honey.	[1,2]	alpha-Copaene
60	(3E,6E)-3,7,11-trimethyldodeca-1,3,6,10-tetraene	000502-61-4	Apple; woody; citrus, herbal, lavender, bergamot, myrrh, neroli, green.	[1,2]	.alpha.-Farnesene
	Other compounds				Other compounds
61	NID1	-	-	-	Unidentified1
62	NID2		-	-	Unidentified2
63	methylbenzene	000108-88-3	Floral; pungent, caramel, ethereal, synthetic, fruity, rubbery, solvent-like; sweet.	[1,2]	Toluene
64	NID3	-	-	-	Unidentified3
65	NID4	-	-	-	Unidentified4
66	naphthalene	000091-20-3	Mothball; medicinal; pungent, dry, tarry.	[1,2]	Naphthalene
67	NID5	-	-	-	Unidentified5
68	NID6	-	-	-	Unidentified6
69	NID7	-	-	-	Unidentified7
70	(Z)-heptadec-8-ene	054290-12-9	Floral. plastic, earthy // animal, roasty, chemical.	[1,2,7,8]	8-Heptadecene
References
1.El-Sayed, A.M. The Pherobase: Database of Pheromones and Semiochemicals; Available online: http://www.pherobase.com/ (accessed on 25 July 2013).
2.The Good Scents Company Information System. Available online: http://www.thegoodscentscompany.com/ (accessed on 25 July 2013).
3.Acree, T.; Arn, H. Flavornet and Human Odor Space. Available online: http://www.flavornet.org/ (accessed on 25 July 2013).
4.Haz-Map. Available online: http://hazmap.nlm.nih.gov/hazardous-agents (accessed on 25 July 2013).
5.Wyllie, S.G.; Leach, D.N.; Wang, Y.M.; Shewfelt, R.L. Sulfur Volatiles in Cucumis-Melo Cv Makdimon (Muskmelon) Aroma—Sensory Evaluation by Gas-Chromatography Olfactometry. In Sulfur Compounds in Foods; Mussinan, C.J., Keelan, M.E., Eds.; American Chemical Society: Washington DC, USA, 1994; ACS Symposiun Series Volume 564, pp. 36–48.
6. Leffingwell, D.; Leffingwell, J.C. Odour and Flavour Threshold Values in Air, Water and Other Media. Available online: http://www.thresholdcompilation.com/
7.Selli, S.; Prost, C.; Serot, T. Odour-active and off-odour components in rainbow trout (Oncorhynchus mykiss) extracts obtained by microwave assisted distillation-solvent extraction. Food Chem. 2009, 114, 317–322.
8.Valet, V.; Serot, T.; Cardinal, M.; Knockaert, C.; Prost, C. Olfactometric determination of the most potent odor-active compounds in salmon muscle (Salmo salar) smoked by using four smoke generation techniques. J. Agric. Food Chem. 2007, 55, 4518–4525.
© 2013 by the authors; licensee MDPI, Basel, Switzerland. This article is an open access article distributed under the terms and conditions of the Creative Commons Attribution license (http://creativecommons.org/licenses/by/3.0/).
